# Supplementary material
Source: PubMed Central journal article supplement (PMC5005882)
Supplement: 11357_2016_9888_MOESM1_ESM.pdf [file 11357_2016_9888_MOESM1_ESM.pdf]

## SUPPLEMENTARY TABLES

**Supplementary Table 1** - Prevalence of weakness using published criteria by FNIH Sarcopenia Project and Fried et al. (2001).

|                         | <b>Kingston</b> | <b>Saint - Hyacinthe</b> | <b>Tirana</b> | <b>Manizales</b> | <b>Natal</b> |
|-------------------------|-----------------|--------------------------|---------------|------------------|--------------|
| <b>Men</b>              | 180             | 189                      | 184           | 182              | 191          |
| FNIH Sarcopenia Project | 5 (2.8%)        | 3 (1.6%)                 | 16 (8.7%)     | 35 (19.2%)       | 27 (14.1%)   |
| Fried et al. (2001)     | 15 (8.3%)       | 17 (9%)                  | 54 (29.3%)    | 81 (44.5%)       | 91 (47.6%)   |
| <b>Women</b>            | 205             | 202                      | 199           | 193              | 210          |
| FNIH Sarcopenia Project | (6.8%)14        | 5 (2.5%)                 | 11.6% (23)    | 13.5% (26)       | 38 (18.1%)   |
| Fried et al. (2001)     | 44 (21.5%)      | 27 (13.4%)               | 75 (37.7%)    | 69 (35.8%)       | 102 (48.6%)  |
