# Supplementary material
Source: PubMed Central journal article supplement (PMC5005882)
Supplement: 11357_2016_9888_MOESM2_ESM.pdf [file 11357_2016_9888_MOESM2_ESM.pdf]

**Supplementary Table 2** – Prevalence of weakness by definitions from Fried et al. (2001), FNIH Sarcopenia Project and Internally-defined cut points.

| <b>Fried et al. (2001)</b> | <b>FNIH Sarcopenia Project</b> |                     |                 | <b>Internally-defined cut points</b> |                     |                 |
|----------------------------|--------------------------------|---------------------|-----------------|--------------------------------------|---------------------|-----------------|
| <b>Men</b>                 | <b>Normal</b>                  | <b>Intermediate</b> | <b>Weakness</b> | <b>Normal</b>                        | <b>Intermediate</b> | <b>Weakness</b> |
| Normal Strength            | 640 (95.8%)                    | 28(4.2%)            | 0 (0%)          | 653 (97.8%)                          | 15 (2.2%)           | 0 (0%)          |
| Weakness                   | 23 (8.9%)                      | 149 (57.8%)         | 86 (33.3%)      | 32 (12.4%)                           | 171 (66.3%)         | 55 (21.3%)      |
| <b>Women</b>               | <b>Normal</b>                  | <b>Intermediate</b> | <b>Weakness</b> | <b>Normal</b>                        | <b>Intermediate</b> | <b>Weakness</b> |
| Normal Strength            | 631 (91.2%)                    | 61(8.8%)            | 0 (0%)          | 523 (75.6%)                          | 169 (24.4%)         | 0 (0%)          |
| Weakness                   | 75 (23.7%)                     | 136 (42.9%)         | 106 (33.4%)     | 0 (0%)                               | 124 (39.1%)         | 193 (60.9%)     |
