# Supplementary material
Source: PubMed Central journal article supplement (PMC5005882)
Supplement: 11357_2016_9888_MOESM3_ESM.pdf [file 11357_2016_9888_MOESM3_ESM.pdf]

**Supplementary Table 3** - Odds ratios of slowness according to HGS/BMI categories in each research site in men, by selected characteristics.

|                            | CANADA          |                | ALBANIA         |              | LATIN AMERICA   |                |
|----------------------------|-----------------|----------------|-----------------|--------------|-----------------|----------------|
|                            | Normal Strength | Weak           | Normal Strength | Weak         | Normal Strength | Weak           |
|                            | >1              | ≤ 1            | >1              | ≤ 1          | >1              | ≤ 1            |
| <b>All</b>                 | 1.0             | 3.55           | 1.0             | 1.35         | 1.0             | 3.45           |
| <b>Age (y)</b>             | (referent)      | (1.39-9.10)†   | (referent)      | (0.69-2.67)  | (referent)      | (2.04-5.86) †  |
| 65-69                      | 1.0             | 4.92           | 1.0             | 1.93         | 1.0             | 4.75           |
|                            | (referent)      | (1.18-20.51)†  | (referent)      | (0.66-5.65)  | (referent)      | (2.23-10.15) † |
| 70-74                      | 1.0             | 1.65           | 1.0             | 0.94         | 1.0             | 2.67           |
|                            | (referent)      | (0.41-6.54)    | (referent)      | (0.37-2.34)  | (referent)      | (1.25-5.69) †  |
| <b>BMI</b>                 |                 |                |                 |              |                 |                |
| Normal weight              | 1.0             | 6.91           | 1.0             | -            | 1.0             | 1.46           |
|                            | (referent)      | (0.54-87.65)†  | (referent)      |              | (referent)      | (0.45-4.74)    |
| Overweight                 | 1.0             | -              | 1.0             | 1.22         | 1.0             | 5.11           |
|                            | (referent)      |                | (referent)      | (0.47-3.14)  | (referent)      | (2.17-12.01) † |
| Obese                      | 1.0             | 3.40           | 1.0             | 1.71         | 1.0             | 3.39           |
|                            | (referent)      | (1.07-10.75)†  | (referent)      | (0.49-5.98)  | (referent)      | (1.13-10.14) † |
| <b>Height (m)*</b>         |                 |                |                 |              |                 |                |
| Tertile 1                  | 1.0             | 3.40           | 1.0             | 2.19         | 1.0             | 3.12           |
|                            | (referent)      | (1.07-10.75)   | (referent)      | (0.78-6.14)  | (referent)      | (1.43-6.77) †  |
| Tertile 2                  | 1.0             | 2.89           | 1.0             | 0.48         | 1.0             | 3.57           |
|                            | (referent)      | (0.50-16.46)   | (referent)      | (0.13-1.76)  | (referent)      | (1.45-8.78) †  |
| Tertile 3                  | 1.0             | 6.86           | 1.0             | 2.38         | 1.0             | 2.38           |
|                            | (referent)      | (1.09-43.01) † | (referent)      | (0.53-11.06) | (referent)      | (4.54-19.28) † |
| <b>Waist circumference</b> |                 |                |                 |              |                 |                |
| Non obese                  | 1.0             | 3.48           | 1.0             | 1.24         | 1.0             | 1.24           |
|                            | (referent)      | (1.18-10.27) † | (referent)      | (0.61-2.52)  | (referent)      | (0.61-2.52)    |
| Abdominal                  | 1.0             | 1.00           | 1.0             | -            | 1.0             | -              |

Obesity

(referent)

(0.11-8.94)

(referent)

(referent)

---

† p value < 0.05. \* Values for tertile in Canada: 1.19≤Tertile 1<1.69; 1.69≤Tertile 2<1.74; 1.74≤Tertile 3<1.98. Values for tertile in Albania: 1.42≤Tertile 1< 1.64; 1.64≤Tertile 2<1.69; 1.69≤Tertile 3<1.85. Values for tertile in Latin America: 1.40≤Tertile 1<1.61; 1.61≤Tertile 2<1.65; 1.65≤Tertile 3< 1.87.
