# Supplementary material
Source: PubMed Central journal article supplement (PMC5005882)
Supplement: 11357_2016_9888_MOESM4_ESM.pdf [file 11357_2016_9888_MOESM4_ESM.pdf]

**Supplementary Table 4** - Odds ratios of slowness according to HGS/BMI categories in each research site in women, by selected characteristics.

|                            | CANADA                                   |                                                     |                                        | ALBANIA                                  |                                                     |                                        | LATIN AMERICA                            |                                                     |                                        |
|----------------------------|------------------------------------------|-----------------------------------------------------|----------------------------------------|------------------------------------------|-----------------------------------------------------|----------------------------------------|------------------------------------------|-----------------------------------------------------|----------------------------------------|
|                            | Normal<br>≥0.668<br>kg/kg/m <sup>2</sup> | Intermediate<br>0.557-0.667<br>kg/kg/m <sup>2</sup> | Weak<br><0.557<br>kg/kg/m <sup>2</sup> | Normal<br>≥0.668<br>kg/kg/m <sup>2</sup> | Intermediate<br>0.557-0.667<br>kg/kg/m <sup>2</sup> | Weak<br><0.557<br>kg/kg/m <sup>2</sup> | Normal<br>≥0.668<br>kg/kg/m <sup>2</sup> | Intermediate<br>0.557-0.667<br>kg/kg/m <sup>2</sup> | Weak<br><0.557<br>kg/kg/m <sup>2</sup> |
| <b>All</b>                 | 1.0<br>(referent)                        | 2.83<br>(1.22-6.56) †                               | 9.34<br>(4.55-19.37) †                 | 1.0<br>(referent)                        | 2.49<br>(1.10-5.59) †                               | 3.52<br>(1.66-7.47) †                  | 1.0<br>(referent)                        | 1.45<br>(0.83-2.56)                                 | 4.74<br>(2.62-8.57) †                  |
| <b>Age (y)</b>             |                                          |                                                     |                                        |                                          |                                                     |                                        |                                          |                                                     |                                        |
| 65-69                      | 1.0<br>(referent)                        | 4.28<br>(1.01-18.02) †                              | 15.42<br>(5.03-47.25) †                | 1.0<br>(referent)                        | 2.62<br>(0.69-9.87)                                 | 3.00<br>(1.12-8.01) †                  | 1.0<br>(referent)                        | 1.56<br>(0.71-3.40)                                 | 6.60<br>(2.75-15.85) †                 |
| 70-74                      | 1.0<br>(referent)                        | 1.80<br>(0.63-5.13)                                 | 5.52<br>(2.05-14.86) †                 | 1.0<br>(referent)                        | 1.78<br>(0.61-5.18)                                 | 4.81<br>(1.24-18.60) †                 | 1.0<br>(referent)                        | 1.21<br>(0.52-2.81)                                 | 3.70<br>(1.58-8.67) †                  |
| <b>BMI</b>                 |                                          |                                                     |                                        |                                          |                                                     |                                        |                                          |                                                     |                                        |
| Normal weight              | 1.0<br>(referent)                        | 2.22<br>(0.24-20.57)                                | 13.33<br>(2.90-24.67) †                | 1.0<br>(referent)                        | -                                                   | -                                      | 1.0<br>(referent)                        | 0.82<br>(0.27-2.49)                                 | 3.08<br>(0.56-16.67)                   |
| Overweight                 | 1.0<br>(referent)                        | 1.92<br>(0.30-27.28)                                | 10.25<br>(2.04-51.28) †                | 1.0<br>(referent)                        | 0.90<br>(0.18-4.45)                                 | 4.43<br>(1.10-17.72) †                 | 1.0<br>(referent)                        | 1.64<br>(0.65-4.15)                                 | 5.55<br>(1.82-16.90) †                 |
| Obese                      | 1.0<br>(referent)                        | 1.54<br>(0.50-4.75)                                 | 4.60<br>(1.69-12.47) †                 | 1.0<br>(referent)                        | 3.67<br>(1.20-11.18) †                              | 4.19<br>(1.51-11.59) †                 | 1.0<br>(referent)                        | 1.55<br>(0.51-4.66)                                 | 3.65<br>(1.37-9.70) †                  |
| <b>Height (m)*</b>         |                                          |                                                     |                                        |                                          |                                                     |                                        |                                          |                                                     |                                        |
| Tertile 1                  | 1.0<br>(referent)                        | 1.43<br>(0.36-5.72)                                 | 8.46<br>(2.90-24.67) †                 | 1.0<br>(referent)                        | 2.53<br>(1.11-5.74) †                               | 3.53<br>(1.65-7.56) †                  | 1.0<br>(referent)                        | 1.19<br>(0.50-2.83)                                 | 3.86<br>(1.64-9.07) †                  |
| Tertile 2                  | 1.0<br>(referent)                        | 3.97<br>(1.27-12.35) †                              | 9.64<br>(3.63-25.59) †                 | 1.0<br>(referent)                        | -                                                   | -                                      | 1.0<br>(referent)                        | 1.66<br>(0.52-5.33)                                 | 4.44<br>(1.19-16.50) †                 |
| Tertile 3                  | 1.0<br>(referent)                        | 1.54<br>(0.50-4.75)                                 | 4.60<br>(1.69-12.47) †                 | 1.0<br>(referent)                        | -                                                   | -                                      | 1.0<br>(referent)                        | 1.44<br>(0.51-4.06)                                 | 5.46<br>(1.71-17.45) †                 |
| <b>Waist circumference</b> |                                          |                                                     |                                        |                                          |                                                     |                                        |                                          |                                                     |                                        |
| Non obese                  | 1.0<br>(referent)                        | 3.04<br>(0.32-28.90)                                | -                                      | 1.0<br>(referent)                        | -                                                   | -                                      | 1.0<br>(referent)                        | 1.34<br>(0.47-3.78)                                 | 7.56<br>(1.57-36.39) †                 |
| Abdominal Obesity          | 1.0<br>(referent)                        | 2.38<br>(0.94-6.01)                                 | 8.43<br>(3.84-18.49) †                 | 1.0<br>(referent)                        | 2.59<br>(1.13-5.90) †                               | 3.45<br>(1.59-7.47) †                  | 1.0<br>(referent)                        | 1.33<br>(0.67-2.67)                                 | 3.52<br>(1.81-6.83) †                  |

---

† p value < 0.05. \* Values for tertile in Canada:  $1.40 \leq \text{Tertile 1} < 1.57$ ;  $1.57 \leq \text{Tertile 2} < 1.61$ ;  $1.61 \leq \text{Tertile 3} < 1.76$ . Values for tertile in Albania:  $1.39 \leq \text{Tertile 1} < 1.52$ ;  $1.52 \leq \text{Tertile 2} < 1.56$ ;  $1.56 \leq \text{Tertile 3} < 1.77$ . Values for tertile in Latin America:  $1.32 \leq \text{Tertile 1} < 1.48$ ;  $1.48 \leq \text{Tertile 2} < 1.52$ ;  $1.52 \leq \text{Tertile 3} < 1.75$ .
